# Supplementary material for: Standardized Saponin Extract from Baiye No.1 Tea (Camellia sinensis) Flowers Induced S Phase Cell Cycle Arrest and Apoptosis via AKT-MDM2-p53 Signaling Pathway in Ovarian Cancer Cells
Source: MDPI journal article supplement (doi:10.3390/molecules25153515), 2020-07-31

Article

# Standardized Saponin Extract from Baiye No.1 Tea (*Camellia sinensis*) Flowers Induced S Phase Cell Cycle Arrest and Apoptosis via AKT-MDM2-p53 Signaling Pathway in Ovarian Cancer Cells

Youying Tu<sup>1</sup>, Lianfu Chen<sup>1,2</sup>, Ning Ren<sup>1,2</sup>, Bo Li<sup>1</sup>, Yuanyuan Wu<sup>1</sup>, Gary O. Rankin<sup>3</sup>, Yon Rojanasakul<sup>4</sup>, Yaomin Wang<sup>5,\*</sup> and Yi Charlie Chen<sup>2,\*</sup>

<sup>1</sup> Department of Tea Science, Zhejiang University, Hangzhou 310058, Zhejiang, China; youyt@zju.edu.cn (Y.T.); c.lianfu@foxmail.com (L.C.); ningren@zju.edu.cn (N.R.); drlib@zju.edu.cn (B.L.); yywu@zju.edu.cn (Y.W.)

<sup>2</sup> College of Health, Science, Technology and Mathematics, Alderson Broaddus University, Philippi, WV 26416, USA

<sup>3</sup> Department of Biomedical Sciences, Joan C. Edwards School of Medicine, Marshall University, Huntington, WV 25755, USA; rankin@marshall.edu

<sup>4</sup> Department of Pharmaceutical Sciences and WVU Cancer Institute, West Virginia University, Morgantown, WV 26506, USA; yrojan@hsc.wvu.edu

<sup>5</sup> Key Laboratory of Horticulture Plant Biology, Ministry of Education, College of Horticulture & Forestry Sciences, Huazhong Agricultural University, Wuhan 430070, Hubei, China

\* Correspondence: wangym@mail.hzau.edu.cn (Y.W.); chenyc@ab.edu (Y.C.C.)

Academic Editors: Marialuigia Fantacuzzi and Marialuigia Fantacuzzi

Received: 22 June 2020; Accepted: 29 July 2020; Published: date

### Original images for Figure 2 — D

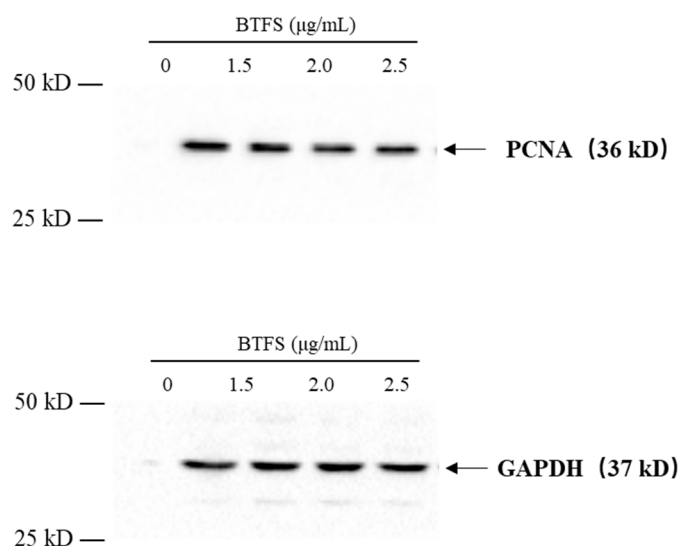

### Original images for Figure 3 — C

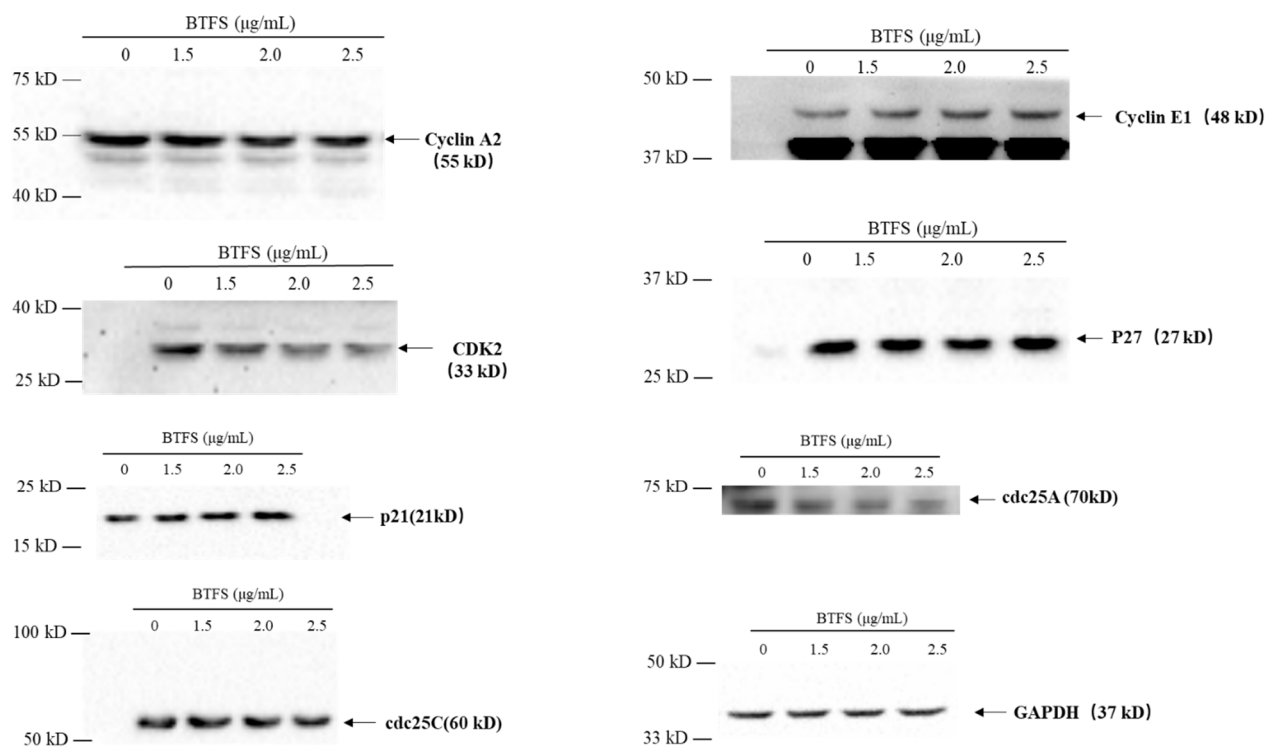

## Original images for Figure 5 — B

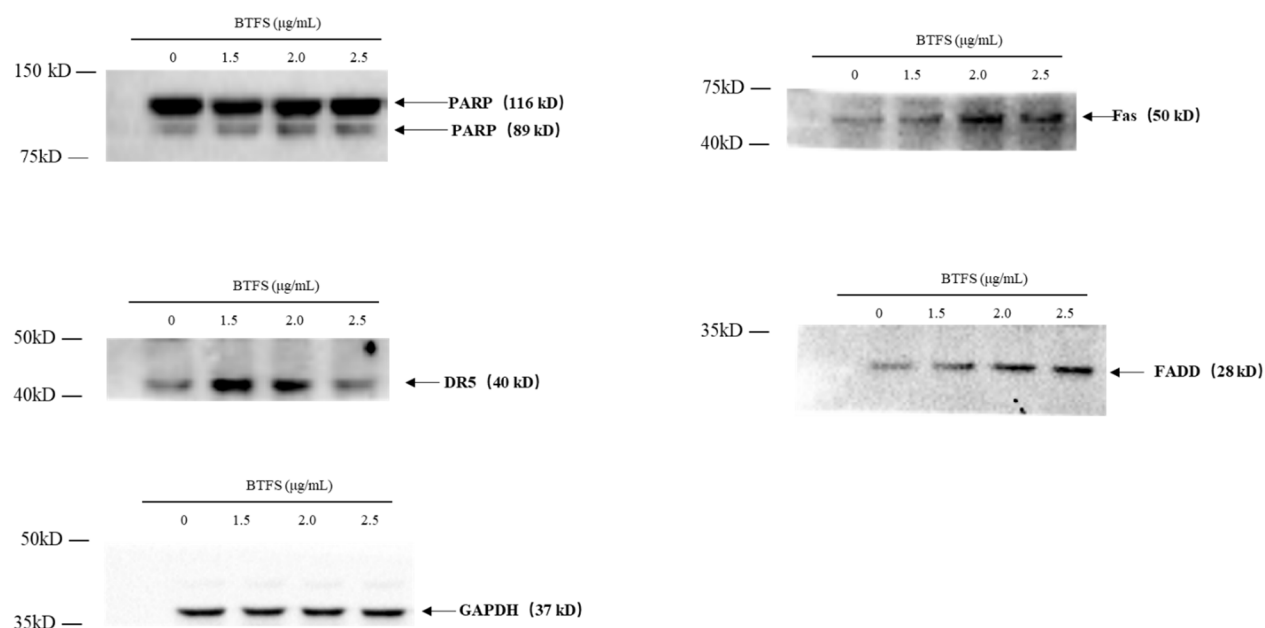

## Original images for Figure 5 — D

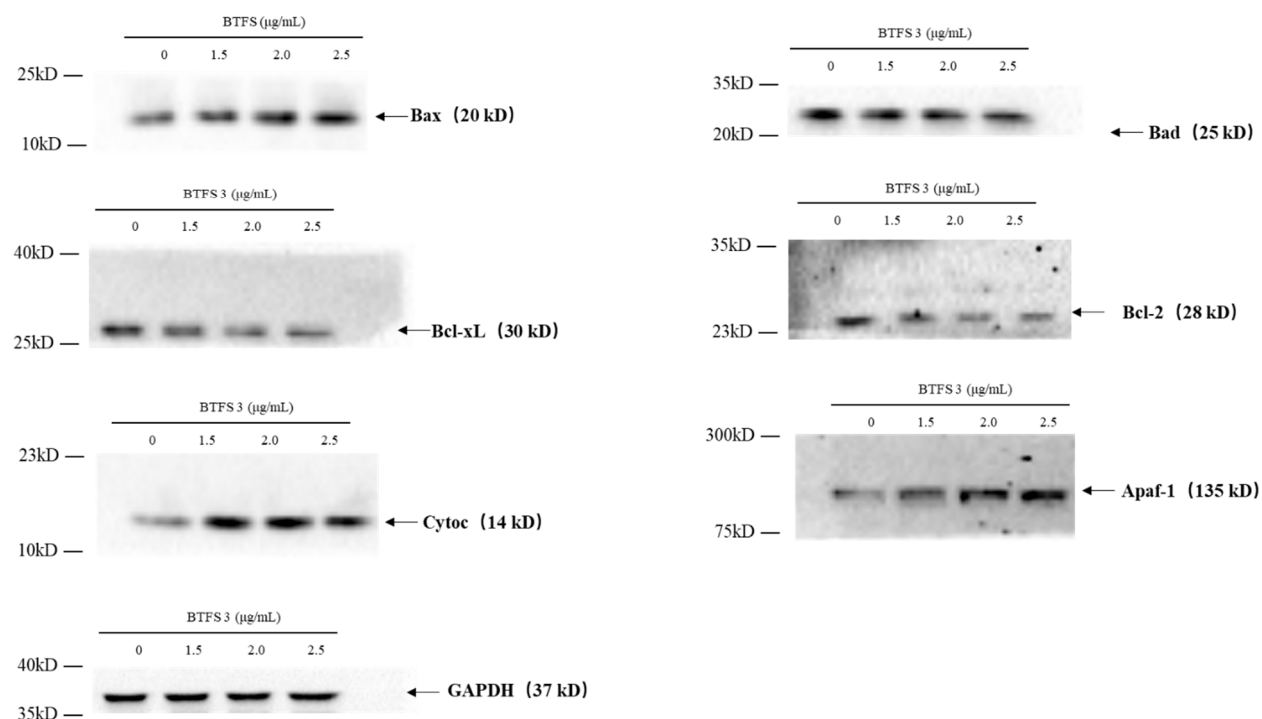

## Original images for Figure 6 — B

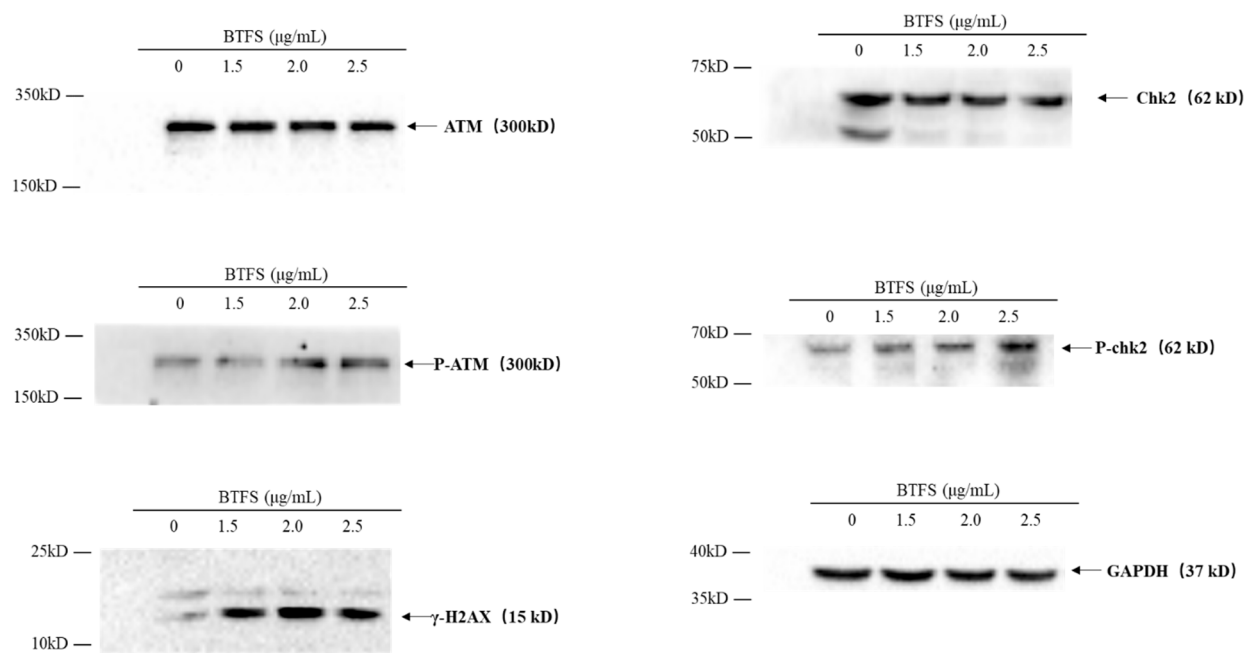

## Original images for Figure 7 — A

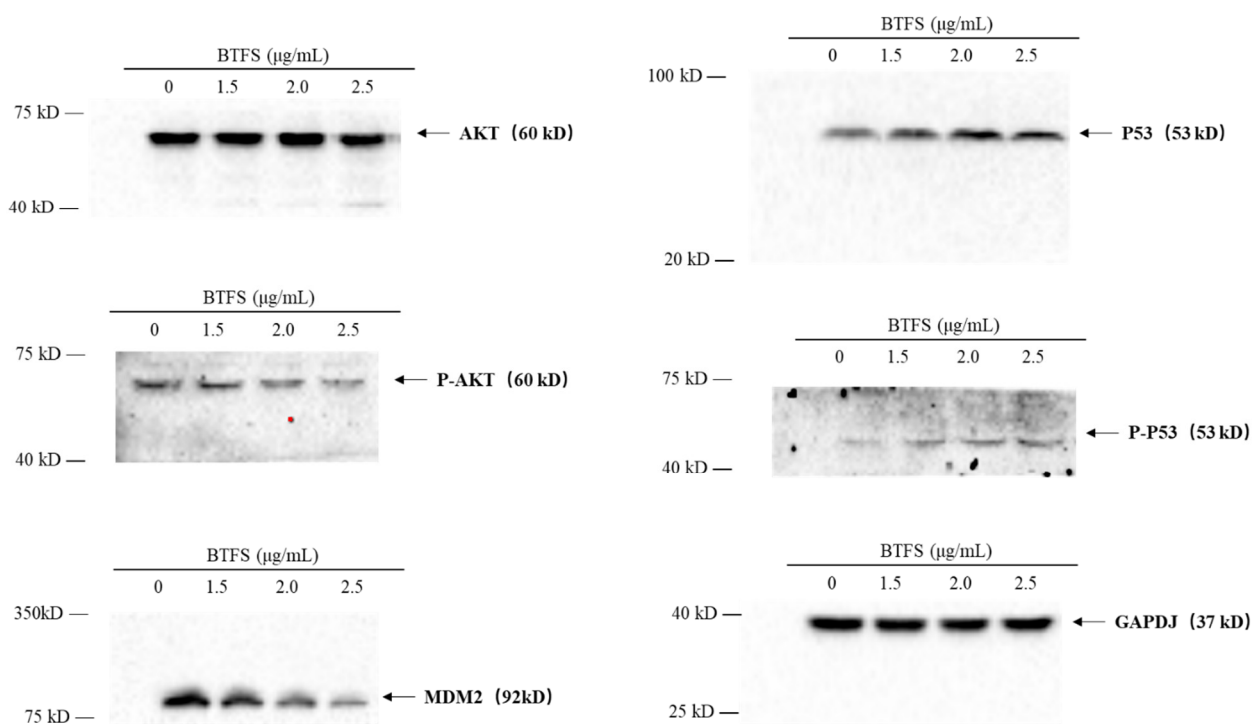

Supplement: s1 [file s1]
